# Supplementary material for: Fitness, Fatness, and Mortality in Men and Women From the UK Biobank: Prospective Cohort Study
Source: PubMed Central journal article supplement (PMC8174221; doi:10.1161/jaha.120.019605), 2021-03-13
Supplement: JAH3-10-e019605-s001.pdf [file JAH3-10-e019605-s001.pdf]

# **SUPPLEMENTAL MATERIAL**

**Table S1. Description of variables included from UK Biobank Data Showcase**

| Item                                           | UK Biobank Field ID(s) | Measurement item(s)                                                          | Definition/data coding (not listed if no changes made to original coding)                                                              | Notes                                                                                                                                                     |
|------------------------------------------------|------------------------|------------------------------------------------------------------------------|----------------------------------------------------------------------------------------------------------------------------------------|-----------------------------------------------------------------------------------------------------------------------------------------------------------|
| Date of Death                                  | 40000                  | (Death register) date of death                                               |                                                                                                                                        |                                                                                                                                                           |
| Date lost to follow-up                         | 191                    | (multiple sources) date which a person is believed to be lost to follow-up   |                                                                                                                                        | <a href="http://biobank.ndph.ox.ac.uk/showcase/field.cgi?id=191">http://biobank.ndph.ox.ac.uk/showcase/field.cgi?id=191</a>                               |
| Primary cause of death                         | 40001                  | (Death register) underlying/primary cause of death                           |                                                                                                                                        | <a href="http://biobank.ndph.ox.ac.uk/showcase/field.cgi?id=40001">http://biobank.ndph.ox.ac.uk/showcase/field.cgi?id=40001</a>                           |
| Birthday                                       | 34 & 52                | (Registry, updated by participant) year and month of birth                   | Date set to 15th for all participants                                                                                                  |                                                                                                                                                           |
| Country                                        | 54                     | (Automatically acquired at participant consent) UK Biobank assessment centre |                                                                                                                                        |                                                                                                                                                           |
| Sex                                            | 31                     | (Registry, updated by participant)                                           |                                                                                                                                        |                                                                                                                                                           |
| Date of attending UK Biobank assessment centre | 53                     | (Acquired at UK Biobank Reception)                                           | Wales = if `x`== 11003   `x`==11022   `x`==11023<br>Scotland = if `x`== 11005   `x`==11004<br>England = if none of the above satisfied | <a href="http://biobank.ndph.ox.ac.uk/showcase/field.cgi?id=54">http://biobank.ndph.ox.ac.uk/showcase/field.cgi?id=54</a>                                 |
| Tv-viewing                                     | 1070                   | (Questionnaire) self-reported time-use of tv-viewing                         | TV-viewing = 0.5 if `x`== 'less than 1h'                                                                                               |                                                                                                                                                           |
| Resting HR                                     | 102                    | Measured pulse rate during blood pressure readings                           |                                                                                                                                        | <a href="http://biobank.ndph.ox.ac.uk/showcase/showcase/docs/Bloodpressure.pdf">http://biobank.ndph.ox.ac.uk/showcase/showcase/docs/Bloodpressure.pdf</a> |
| ECG/bike method for fitness test               | 6019                   | Bike method                                                                  |                                                                                                                                        | <a href="http://biobank.ndph.ox.ac.uk/showcase/showcase/docs/Cardio.pdf">http://biobank.ndph.ox.ac.uk/showcase/showcase/docs/Cardio.pdf</a>               |
| Completion status of test                      | 6020                   | Completion status of test                                                    |                                                                                                                                        | <a href="http://biobank.ndph.ox.ac.uk/showcase/showcase/docs/Cardio.pdf">http://biobank.ndph.ox.ac.uk/showcase/showcase/docs/Cardio.pdf</a>               |
| Cycling program category                       | 6024                   | Cycling program based on individual risk                                     |                                                                                                                                        | <a href="http://biobank.ndph.ox.ac.uk/showcase/showcase/docs/Cardio.pdf">http://biobank.ndph.ox.ac.uk/showcase/showcase/docs/Cardio.pdf</a>               |
| Maximum workload during fitness test           | 6032                   | Maximum workload attained during the fitness test                            |                                                                                                                                        | <a href="http://biobank.ndph.ox.ac.uk/showcase/showcase/docs/Cardio.pdf">http://biobank.ndph.ox.ac.uk/showcase/showcase/docs/Cardio.pdf</a>               |
| Maximum heart rate during fitness test         | 6033                   | Maximum heart rate recorded during bike exercise test                        |                                                                                                                                        | <a href="http://biobank.ndph.ox.ac.uk/showcase/showcase/docs/Cardio.pdf">http://biobank.ndph.ox.ac.uk/showcase/showcase/docs/Cardio.pdf</a>               |
| Number of trend entries                        | 6038                   | Measurements during exercise test                                            |                                                                                                                                        | <a href="http://biobank.ndph.ox.ac.uk/showcase/showcase/docs/Cardio.pdf">http://biobank.ndph.ox.ac.uk/showcase/showcase/docs/Cardio.pdf</a>               |
| Duration of fitness test                       | 6039                   | Length of the exercise test                                                  |                                                                                                                                        | <a href="http://biobank.ndph.ox.ac.uk/showcase/showcase/docs/Cardio.pdf">http://biobank.ndph.ox.ac.uk/showcase/showcase/docs/Cardio.pdf</a>               |
| Heart rate (from ECG)                          | 5983                   | Heart rate from ECG                                                          |                                                                                                                                        | <a href="http://biobank.ndph.ox.ac.uk/showcase/showcase/docs/Cardio.pdf">http://biobank.ndph.ox.ac.uk/showcase/showcase/docs/Cardio.pdf</a>               |
| Load (watt)                                    | 5984                   | Workload in watts                                                            |                                                                                                                                        | <a href="http://biobank.ndph.ox.ac.uk/showcase/showcase/docs/Cardio.pdf">http://biobank.ndph.ox.ac.uk/showcase/showcase/docs/Cardio.pdf</a>               |

|                                        |                            |                                                                                                                                        |                                                                                                                                         |                                                                                                                                                                                                                                                                                                                                                                                                                                                   |
|----------------------------------------|----------------------------|----------------------------------------------------------------------------------------------------------------------------------------|-----------------------------------------------------------------------------------------------------------------------------------------|---------------------------------------------------------------------------------------------------------------------------------------------------------------------------------------------------------------------------------------------------------------------------------------------------------------------------------------------------------------------------------------------------------------------------------------------------|
| Time                                   | 5986                       | Time during specific test-phase                                                                                                        |                                                                                                                                         | <a href="http://biobank.ndph.ox.ac.uk/showcase/showcase/docs/Cardio.pdf">http://biobank.ndph.ox.ac.uk/showcase/showcase/docs/Cardio.pdf</a>                                                                                                                                                                                                                                                                                                       |
| Phase name                             | 5987                       | Name of test-phase                                                                                                                     |                                                                                                                                         | <a href="http://biobank.ndph.ox.ac.uk/showcase/showcase/docs/Cardio.pdf">http://biobank.ndph.ox.ac.uk/showcase/showcase/docs/Cardio.pdf</a>                                                                                                                                                                                                                                                                                                       |
| Stage name                             | 5988                       | Name of test-stage                                                                                                                     |                                                                                                                                         | <a href="http://biobank.ndph.ox.ac.uk/showcase/showcase/docs/Cardio.pdf">http://biobank.ndph.ox.ac.uk/showcase/showcase/docs/Cardio.pdf</a>                                                                                                                                                                                                                                                                                                       |
| Waist circumference                    | 48                         | Measured waist circumference                                                                                                           |                                                                                                                                         |                                                                                                                                                                                                                                                                                                                                                                                                                                                   |
| Body mass index                        | 21001                      | Measured height and weight                                                                                                             |                                                                                                                                         |                                                                                                                                                                                                                                                                                                                                                                                                                                                   |
| Body fat %                             | 23099                      | Body composition estimation by impedance measurement                                                                                   |                                                                                                                                         |                                                                                                                                                                                                                                                                                                                                                                                                                                                   |
| Oily Fish intake (servings/week)       | 1329                       | (Questionnaire) self-reported frequency of oily fish intake                                                                            | Never = 0<br>less than once a week = 0.5<br>Once a week = 1<br>2-4 times a week = 3<br>5-6 times a week = 5.5<br>Once or more daily = 7 | Included as part of diet pattern variable                                                                                                                                                                                                                                                                                                                                                                                                         |
| Non-oily Fish intake (servings/week)   | 1339                       | (Questionnaire) self-reported frequency of non-oily fish intake                                                                        | Never = 0<br>less than once a week = 0.5<br>Once a week = 1<br>2-4 times a week = 3<br>5-6 times a week = 5.5<br>Once or more daily = 7 | Included as part of diet pattern variable                                                                                                                                                                                                                                                                                                                                                                                                         |
| Fruit/vegetable intake (servings/week) | 1289, 1299, 1309, 1319     | (Questionnaire) self-reported frequency of cooked vegetable intake, salad/raw vegetable intake, fresh fruit intake, dried fruit intake | Less than one = 0.5<br>Otherwise, number of reported tablespoons (vegetables) and pieces (fruit) as reported                            | Included as part of diet pattern variable                                                                                                                                                                                                                                                                                                                                                                                                         |
| Processed meat (servings/week)         | 1349                       | (Questionnaire) self-reported frequency of processed meat intake                                                                       | Never = 0<br>less than once a week = 0.5<br>Once a week = 1<br>2-4 times a week = 3<br>5-6 times a week = 5.5<br>Once or more daily = 7 | Included as part of diet pattern variable                                                                                                                                                                                                                                                                                                                                                                                                         |
| Red meat (servings/week)               | 1369, 1379, 1389           | (Questionnaire) self-reported frequency of beef, lamb/mutton and pork intake                                                           | Never = 0<br>less than once a week = 0.5<br>Once a week = 1<br>2-4 times a week = 3<br>5-6 times a week = 5.5<br>Once or more daily = 7 | Included as part of diet pattern variable                                                                                                                                                                                                                                                                                                                                                                                                         |
| Healthy diet pattern                   | Generated for this dataset | Composite of self-reported fish, fruit/vegetable and processed/red meat intake                                                         | 1 if meeting 2 of the 3 food item targets<br>0 if not meeting 2 of the targets                                                          | Fish: $\geq 2$ servings/week, including 1 with oily fish<br><a href="https://www.nhs.uk/live-well/eat-well/eight-tips-for-healthy-eating/">https://www.nhs.uk/live-well/eat-well/eight-tips-for-healthy-eating/</a><br><br>Fruit/vegetables: $\geq 5$ servings/day<br><a href="https://www.nhs.uk/live-well/eat-well/5-a-day-what-counts/">https://www.nhs.uk/live-well/eat-well/5-a-day-what-counts/</a><br>+ doi: 10.1016/S2468-2667(18)30200-7 |

|                               |                              |                                                                                                                                                                                                                                                           |                                                                                                                                                                                                                                                       |                                                                                                                                                                                                                                                   |
|-------------------------------|------------------------------|-----------------------------------------------------------------------------------------------------------------------------------------------------------------------------------------------------------------------------------------------------------|-------------------------------------------------------------------------------------------------------------------------------------------------------------------------------------------------------------------------------------------------------|---------------------------------------------------------------------------------------------------------------------------------------------------------------------------------------------------------------------------------------------------|
|                               |                              |                                                                                                                                                                                                                                                           |                                                                                                                                                                                                                                                       | Processed/red meat intake: <= 3 servings of red meat/week & <=1 serving of processed meat/week<br><a href="https://www.ncbi.nlm.nih.gov/pubmed/30467019">https://www.ncbi.nlm.nih.gov/pubmed/30467019</a> +<br>doi: 10.1016/S2468-2667(18)30200-7 |
| Education                     | 6138                         | (Questionnaire) self-reported qualifications                                                                                                                                                                                                              | No qualifications = if `x`== -7<br>A/AS/O/GCSE/CSE/NVQ/HND/HNC/Other professional qualifications = if `x`== 2   `x`== 3   `x`== 4   `x`== 5   `x`== 6<br>College/University degree = if `x`== 1                                                       | Original categories do not have a clear ordinal structure which accounts for all 7 answering options                                                                                                                                              |
| Townsend                      | 189                          | Townsend deprivation index calculated immediately prior to participant joining UK Biobank. Based on the preceding national census output areas. Each participant is assigned a score corresponding to the output area in which their postcode is located. |                                                                                                                                                                                                                                                       |                                                                                                                                                                                                                                                   |
| Partner status                | Combinations of 709 and 6414 | (Questionnaire) self-reported individuals (including yourself) living in household and relation to those individuals                                                                                                                                      | Not married/living with partner = if n_709_0_0 == 1<br>Married/living with partner = if n_709_0_0 >1 & n_6414_0_0 - n_6414_0_4 == 1                                                                                                                   |                                                                                                                                                                                                                                                   |
| Ethnicity                     | 21000                        | (Questionnaire) amalgam of sequential branching questions                                                                                                                                                                                                 | White = if `x`==1   `x`==1001   `x`==1002   `x`==1003<br>Other = if above not satisfied                                                                                                                                                               |                                                                                                                                                                                                                                                   |
| Employment                    | 6142                         | (Questionnaire) self-reported 'current situation'                                                                                                                                                                                                         | Employed = if `x`== 1                                                                                                                                                                                                                                 |                                                                                                                                                                                                                                                   |
| Smoking                       | 20116                        | (Questionnaire) self-reported smoking-status                                                                                                                                                                                                              |                                                                                                                                                                                                                                                       |                                                                                                                                                                                                                                                   |
| Alcohol                       | Combinations of 20117 & 1558 | (Questionnaire) self-reported drinking status and drinking frequency                                                                                                                                                                                      | Never = n_20117_0_0 == 0<br>Previous = n_20117_0_0 == 1<br>Current, <3times/week = 2 if n_20117_0_0 == 2 & (n_1558_0_0 == 3   n_1558_0_0 == 4   n_1558_0_0 == 5<br>Current, ≥3times/week = 3 if n_20117_0_0 == 2 & (n_1558_0_0 == 1   n_1558_0_0 == 2 |                                                                                                                                                                                                                                                   |
| Beta-blocker use              | 20003                        | (Interview) self-reported use of beta-blockers                                                                                                                                                                                                            | Any of 235 codes listed in <i>Verweij et al., 2017</i>                                                                                                                                                                                                | doi: 10.1038/s41598-017-03062-8                                                                                                                                                                                                                   |
| Calcium-Channel inhibitor use | 20003                        | (Interview) self-reported use of Calcium-Channel inhibitors                                                                                                                                                                                               | Any of 80 codes listed in <i>Verweij et al., 2017</i>                                                                                                                                                                                                 | doi: 10.1038/s41598-017-03062-8                                                                                                                                                                                                                   |
| Statins use                   | 20003                        | (Interview) self-reported use of statins                                                                                                                                                                                                                  | Atorvastatin, Fluvastatin, Pravastatin, Rosuvastatin, Simvastatin                                                                                                                                                                                     | <a href="https://www.nhs.uk/conditions/statins/">https://www.nhs.uk/conditions/statins/</a>                                                                                                                                                       |
| Depression                    | 20002                        | (Interview) self-reported depression                                                                                                                                                                                                                      | If `x`== 1286                                                                                                                                                                                                                                         | Not including post-natal depression                                                                                                                                                                                                               |
| Asthma                        | t42014                       | (Algorithmically defined outcomes) Asthma from self-report or hospital admission EHR                                                                                                                                                                      | If `x` < assessment date                                                                                                                                                                                                                              | <a href="http://biobank.ctsu.ox.ac.uk/crystal/refer.cgi?id=4124">http://biobank.ctsu.ox.ac.uk/crystal/refer.cgi?id=4124</a>                                                                                                                       |

|                                                   |                                   |                                                                                                                                                                                                                                                                                                                                                                                                         |                                                                                                                                                                                                                                                                                                                                                                                                                                                                                                                                          |                                                                                                                                                                                                                                                                                                                                                                                                                            |
|---------------------------------------------------|-----------------------------------|---------------------------------------------------------------------------------------------------------------------------------------------------------------------------------------------------------------------------------------------------------------------------------------------------------------------------------------------------------------------------------------------------------|------------------------------------------------------------------------------------------------------------------------------------------------------------------------------------------------------------------------------------------------------------------------------------------------------------------------------------------------------------------------------------------------------------------------------------------------------------------------------------------------------------------------------------------|----------------------------------------------------------------------------------------------------------------------------------------------------------------------------------------------------------------------------------------------------------------------------------------------------------------------------------------------------------------------------------------------------------------------------|
| Chronic respiratory diseases (not including COPD) | 20002                             | (Interview) self-reported bronchiectasis, interstitial lung disease, asbestosis, pulmonary fibrosis, fibrosing alveolitis/unspecified alveolitis, respiratory failure                                                                                                                                                                                                                                   | if `x`==1114   `x`==1115   `x`==1120   `x`==1121   `x`==1122   `x`==1124                                                                                                                                                                                                                                                                                                                                                                                                                                                                 | Individuals reporting; other respiratory problems, sleep apnea, pleurisy, pneumothorax, spontaneous pneumothorax/recurrent pneumothorax, pleural plaques (not known asbestosis), pleural effusion not excluded as these are not chronic or not debilitating<br><br>Respiratory infection, pneumonia, lung abscess, empyema not included as individuals with these conditions are unlikely to attend the examination center |
| COPD                                              | 42016                             | (Algorithmically defined outcomes) COPD from self-report or hospital admission EHR                                                                                                                                                                                                                                                                                                                      | If `x` < assessment date                                                                                                                                                                                                                                                                                                                                                                                                                                                                                                                 | <a href="http://biobank.ctsu.ox.ac.uk/crystal/refer.cgi?id=4125">http://biobank.ctsu.ox.ac.uk/crystal/refer.cgi?id=4125</a>                                                                                                                                                                                                                                                                                                |
| Chronic immunological/systemic diseases           | 20002                             | (Interview) self-reported rheumatoid arthritis, vasculitis, giant cell/temporal arteritis, polymyalgia rheumatica, Wegners granulmatosis, microscopic polyarteritis, polyarteritis nodosa, systemic lupus erythematosus/sle, sjogren's syndrome/sicca syndrome, dermatopolymyositis, dermatomyositis, polymyositis, scleroderma/systemic sclerosis, chronic fatigue syndrome, antiphospholipid syndrome | if `x`==1464   `x`==1372   `x`==1376   `x`==1377   `x`==1378   `x`==1379   `x`==1380   `x`==1381   `x`==1382   `x`==1383   `x`==1480   `x`==1481   `x`==1384   `x`==1482   `x`==1564                                                                                                                                                                                                                                                                                                                                                     | Individuals reporting; sarcoidosis, connective tissue disorder, Raynaud's phenomenon/disease not excluded<br><br>Allergy/hypersensitivity/anaphylaxis variables are not considered                                                                                                                                                                                                                                         |
| Liver failure/cirrhosis                           | 20002                             | (Interview) self-reported liver failure/cirrhosis, primary biliary cirrhosis, alcoholic liver disease / alcoholic cirrhosis                                                                                                                                                                                                                                                                             | if `x`==1158   `x`==1506   `x`==1604                                                                                                                                                                                                                                                                                                                                                                                                                                                                                                     |                                                                                                                                                                                                                                                                                                                                                                                                                            |
| CVD at baseline                                   | 42000, 42006, 42008, 42010, 42012 | (Algorithmically defined outcomes) myocardial infarction, stroke, ischaemic stroke, subarachnoid haemorrhage, brain haemorrhage                                                                                                                                                                                                                                                                         | ICD-10:<br>MI: I21, I22, I23, I24.1, I25.2<br>Subarachnoid haemorrhage: I60<br>Intracerebral haemorrhage: I61<br>Cerebral infarction: I63<br>Stroke, not specified as haemorrhage or Infarction: I64.X<br><br>ICD-9:<br>MI: 410, 411, 412.X, 429.79<br>Subarachnoid haemorrhage: 430.X<br>Intracerebral haemorrhage: 431.X<br>Occlusion of cerebral arteries: 434.X<br>Cerebral thrombosis: 434.0<br>Cerebral embolism: 434.1<br>Cerebral artery occlusion, unspecified: 434.9<br>Acute, but ill-defined, cerebrovascular disease: 436.X | <a href="http://biobank.ctsu.ox.ac.uk/crystal/refer.cgi?id=461">http://biobank.ctsu.ox.ac.uk/crystal/refer.cgi?id=461</a><br><a href="http://biobank.ctsu.ox.ac.uk/crystal/refer.cgi?id=462">http://biobank.ctsu.ox.ac.uk/crystal/refer.cgi?id=462</a>                                                                                                                                                                     |

|                                           |                            |                                                                                                                                                        |                                                                                                                                                                                                            |                                                                                                                                                                                                                                                                                                                                                                                                             |
|-------------------------------------------|----------------------------|--------------------------------------------------------------------------------------------------------------------------------------------------------|------------------------------------------------------------------------------------------------------------------------------------------------------------------------------------------------------------|-------------------------------------------------------------------------------------------------------------------------------------------------------------------------------------------------------------------------------------------------------------------------------------------------------------------------------------------------------------------------------------------------------------|
|                                           | 41270, 41280, 41271, 41281 | (Hospital In-patient data)<br>Angina, heart failure                                                                                                    | ICD-10:<br>Angina (I20): I20.0, I20.1, I20.8, I20.9<br>Heart failure (I11, I13, I50): I50.0, I50.1, I50.9, I11.0, I11.9, I13.0, I13.2, I13.9)<br>ICD-9:<br>Angina: 4139<br>Heart failure: 4280, 4281, 4289 | <a href="http://biobank.ctsu.ox.ac.uk/crystal/field.cgi?id=41270">http://biobank.ctsu.ox.ac.uk/crystal/field.cgi?id=41270</a>                                                                                                                                                                                                                                                                               |
| Cancer at baseline                        | 2453                       | (Questionnaire) self-reported cancer                                                                                                                   | If 'x'==1                                                                                                                                                                                                  | <a href="http://biobank.ctsu.ox.ac.uk/crystal/coding.cgi?id=6">http://biobank.ctsu.ox.ac.uk/crystal/coding.cgi?id=6</a><br><a href="http://biobank.ctsu.ox.ac.uk/crystal/field.cgi?id=40006">http://biobank.ctsu.ox.ac.uk/crystal/field.cgi?id=40006</a><br><a href="http://biobank.ctsu.ox.ac.uk/crystal/field.cgi?id=40013&amp;n1=1">http://biobank.ctsu.ox.ac.uk/crystal/field.cgi?id=40013&amp;n1=1</a> |
|                                           | 20001                      | (Interview) self-reported cancer excluding non-melanoma skin cancer                                                                                    | If 'x' != . & 'x' != 1060   'x' != 1061   'x' != 1062   'x' != 1073                                                                                                                                        |                                                                                                                                                                                                                                                                                                                                                                                                             |
|                                           | 40006                      | (Cancer Registry) Any cancer-type (C-D48) excluding non-melanoma skin cancers (ICD-10; C44, ICD-9; 173)                                                |                                                                                                                                                                                                            |                                                                                                                                                                                                                                                                                                                                                                                                             |
| Diabetes (excluding gestational diabetes) | 2443                       | (Questionnaire) self-reported diabetes                                                                                                                 | If 'x'==1 & n_4041_0_0 (gestational diabetes) !=1                                                                                                                                                          |                                                                                                                                                                                                                                                                                                                                                                                                             |
|                                           | 6153 (women)<br>6177 (men) | (Questionnaire) self-reported Insulin user                                                                                                             | If 'x'==3                                                                                                                                                                                                  |                                                                                                                                                                                                                                                                                                                                                                                                             |
|                                           | 20002                      | (Interview) self-reported diabetes                                                                                                                     | if 'x'== 1220   'x'== 1222   'x'==1223                                                                                                                                                                     |                                                                                                                                                                                                                                                                                                                                                                                                             |
|                                           | 30750                      | (Biochemistry) HbA1c                                                                                                                                   | If 'x' ≥48 mmol/l                                                                                                                                                                                          |                                                                                                                                                                                                                                                                                                                                                                                                             |
| Hypertension                              | 6150                       | (Questionnaire) self-reported High Blood Pressure                                                                                                      | If 'x'==4                                                                                                                                                                                                  |                                                                                                                                                                                                                                                                                                                                                                                                             |
|                                           | 6153 (women)<br>6177 (men) | (Questionnaire) self-reported blood pressure medication                                                                                                | If 'x'==2                                                                                                                                                                                                  |                                                                                                                                                                                                                                                                                                                                                                                                             |
|                                           | 4080, 4079, 93, 94         | Measured (manual or automated) systolic and diastolic BP                                                                                               | If SBP≥140   DBP≥90                                                                                                                                                                                        |                                                                                                                                                                                                                                                                                                                                                                                                             |
|                                           | 20002                      | (Interview) self-reported hypertension, essential hypertension                                                                                         | if 'x'==1065   'x'==1072                                                                                                                                                                                   |                                                                                                                                                                                                                                                                                                                                                                                                             |
| Psychological/psychiatric problems        | 20002                      | (Interview) self-reported schizophrenia, mania/bipolar disorder/manic depression, deliberate self-harm/suicide attempt, post-traumatic stress disorder | If 'x'== 1289   'x'== 1290   'x'== 1291   'x'== 1469                                                                                                                                                       |                                                                                                                                                                                                                                                                                                                                                                                                             |
| Substance abuse/dependency                | 20002                      | (Interview) self-reported alcohol dependency, opioid dependency, other substance abuse/dependency                                                      | if `x'==1408   `x'== 1408   `x'== 1410                                                                                                                                                                     |                                                                                                                                                                                                                                                                                                                                                                                                             |
| Anorexia/bulimia/other eating disorder    | 20002                      | (Interview) self-reported anorexia/bulimia/other eating disorder                                                                                       | if `x'==1470                                                                                                                                                                                               |                                                                                                                                                                                                                                                                                                                                                                                                             |
| Chronic/degenerative neurological problem | 20002                      | (Interview) self-reported chronic/degenerative neurological problem, Parkinson's disease, dementia/Alzheimer's/cognitive                               | if `x'==1258   `x'==1259   `x'==1260   `x'==1261   `x'==1262   `x'==1263   `x'== 1397                                                                                                                      |                                                                                                                                                                                                                                                                                                                                                                                                             |

|                         |      |                                                                                                                               |           |                                |
|-------------------------|------|-------------------------------------------------------------------------------------------------------------------------------|-----------|--------------------------------|
|                         |      | impairment, motor neuron disease, myasthenia gravis, multiple sclerosis, other demyelinating disease (not multiple sclerosis) |           |                                |
| Chronic widespread pain | 2956 | (Questionnaire)<br>"Have you had pains all over the body for more than 3 months?"                                             | if `x`==1 | doi: 10.1007/s11657-015-0252-1 |

**Table S2. Age-sex specific cardiorespiratory fitness cut-offs in men and women.**

| <b>W/kg fat-free mass</b> |              |               |             |            |               |             |
|---------------------------|--------------|---------------|-------------|------------|---------------|-------------|
|                           | <b>Women</b> |               |             | <b>Men</b> |               |             |
|                           | <b>Low</b>   | <b>Medium</b> | <b>High</b> | <b>Low</b> | <b>Medium</b> | <b>High</b> |
| < 50yrs                   | < 2.71       | 2.71 - 3.83   | > 3.83      | < 3.40     | 3.40 - 4.49   | > 4.49      |
| 50 - 59.9yrs              | < 2.42       | 2.42 - 3.46   | > 3.46      | < 3.09     | 3.09 - 4.24   | > 4.24      |
| 60 – 69.9yrs              | < 1.90       | 1.90 - 2.90   | > 2.90      | < 2.56     | 2.56 - 3.78   | > 3.78      |
| ≥ 70yrs                   | < 1.53       | 1.53 - 2.36   | > 2.36      | < 2.08     | 2.08 - 3.20   | > 3.20      |
| <b>W/kg body weight</b>   |              |               |             |            |               |             |
|                           | <b>Women</b> |               |             | <b>Men</b> |               |             |
|                           | <b>Low</b>   | <b>Medium</b> | <b>High</b> | <b>Low</b> | <b>Medium</b> | <b>High</b> |
| < 50yrs                   | < 1.73       | 1.73 - 2.50   | > 2.50      | < 2.54     | 2.54 - 3.43   | > 3.43      |
| 50 - 59.9yrs              | < 1.51       | 1.51 - 2.20   | > 2.20      | < 2.29     | 2.29 - 3.18   | > 3.18      |
| 60 – 69.9yrs              | < 1.18       | 1.18 - 1.82   | > 1.82      | < 1.87     | 1.87 - 2.81   | > 2.81      |
| ≥ 70yrs                   | < 0.98       | 0.98 - 1.47   | > 1.47      | < 1.51     | 1.51 - 2.36   | > 2.36      |



**Table S3. Cross-tabulation of BMI- and body fat percentage categories in participants free from baseline CVD/cancer with  $\geq 2$  years of follow-up.**

| <b>BMI</b> \ <b>BF%*</b> | Low    | Medium | High   | Total  |
|--------------------------|--------|--------|--------|--------|
| Normal weight            | 18,350 | 5,214  | 87     | 23,651 |
| Overweight               | 5,373  | 19,803 | 3,826  | 29,002 |
| Obese                    | 70     | 4,001  | 10,219 | 14,290 |
| Total                    | 23,793 | 29,018 | 14,132 |        |

N=66,943 \*Cut-offs based on the sex-specific distribution of the sample in BMI-categories. BF% ranges for women are; Low: 9.4 – 35.2, Medium: 35.3 – 41.9, High: 42.0 - 66.1. BF% ranges for men are; Low: 5.0 – 21.8, Medium: 28.9 – 29.2, High: 29.3 - 47.2.

**Table S4. Cross-tabulation of cardiorespiratory fitness categories based on w/kg and w/fat-free mas**

| <b>W/kg \ W/fat-free mass</b> | Low    | Medium | High   | Total  |
|-------------------------------|--------|--------|--------|--------|
| Low                           | 13,576 | 2,005  | 0      | 15,851 |
| Medium                        | 2,084  | 25,412 | 3,378  | 30,874 |
| High                          | 1      | 3,481  | 27,232 | 30,714 |
| Total                         | 15,661 | 30,898 | 30,610 |        |

N=77,169

**Table S5. Sex-stratified cardiorespiratory fitness-fatness combinations and All-Cause Mortality**

|                           | Model 1<br>CRF/kg + BMI                                  |                   | Model 2<br>CRF/kg + BMI                                       |                   | Model 4<br>CRF/FFM + BF%                                      |                   |
|---------------------------|----------------------------------------------------------|-------------------|---------------------------------------------------------------|-------------------|---------------------------------------------------------------|-------------------|
|                           | All participants<br>(adjusting for prevalent cancer/CVD) |                   | Free from CVD/cancer at baseline and removing early follow-up |                   | Free from CVD/cancer at baseline and removing early follow-up |                   |
|                           | Men                                                      | Women             | Men                                                           | Women             | Men                                                           | Women             |
| <i>N (deaths)</i>         | 36,432 (1066)                                            | 40,737 (665)      | 31,863 (621)                                                  | 35,080 (385)      | 31,863 (621)                                                  | 35,080 (385)      |
| Normal weight /unfit      | 1.98 (1.42, 2.77)                                        | 1.38 (0.97, 1.95) | 1.98 (1.28, 3.05)                                             | 0.94 (0.59, 1.51) | 1.71 (1.10, 2.67)                                             | 0.63 (0.41, 0.98) |
| <i>n (deaths)</i>         | 1609 (68)                                                | 2764 (49)         | 1398 (39)                                                     | 2397 (24)         | 1674 (42)                                                     | 3301 (29)         |
| Normal weight /medium fit | 1.66 (1.23, 2.25)                                        | 1.30 (0.99, 1.73) | 1.62 (1.10, 2.40)                                             | 1.00 (0.69, 1.43) | 1.37 (0.90, 2.07)                                             | 0.56 (0.38, 0.82) |
| <i>n (deaths)</i>         | 3273 (102)                                               | 6312 (103)        | 2908 (60)                                                     | 5432 (53)         | 3218 (55)                                                     | 6049 (44)         |
| Normal weight /fit        | <i>ref</i>                                               | <i>ref</i>        | <i>ref</i>                                                    | <i>ref</i>        | <i>ref</i>                                                    | <i>ref</i>        |
| <i>n (deaths)</i>         | 4666 (72)                                                | 8337 (95)         | 4197 (44)                                                     | 7319 (65)         | 3639 (38)                                                     | 5912 (69)         |
| Overweight /unfit         | 1.71 (1.28, 2.30)                                        | 1.39 (0.99, 1.93) | 1.84 (1.26, 2.69)                                             | 1.07 (0.69, 1.66) | 1.63 (1.10, 2.41)                                             | 0.81 (0.53, 1.25) |
| <i>n (deaths)</i>         | 3218 (130)                                               | 2906 (60)         | 2770 (80)                                                     | 2466 (32)         | 3016 (83)                                                     | 2343 (32)         |
| Overweight /medium fit    | 1.33 (1.02, 1.75)                                        | 1.11 (0.83, 1.48) | 1.28 (0.90, 1.82)                                             | 0.87 (0.60, 1.27) | 1.16 (0.80, 1.68)                                             | 0.71 (0.49, 1.02) |
| <i>n (deaths)</i>         | 7557 (202)                                               | 6330 (98)         | 6649 (114)                                                    | 5409 (53)         | 6516 (112)                                                    | 5138 (55)         |
| Overweight /fit           | 1.33 (1.01, 1.75)                                        | 1.21 (0.91, 1.61) | 1.36 (0.96, 1.93)                                             | 1.07 (0.75, 1.53) | 1.15 (0.79, 1.67)                                             | 0.70 (0.49, 1.01) |
| <i>n (deaths)</i>         | 7593 (180)                                               | 5791 (96)         | 6725 (112)                                                    | 4983 (58)         | 6720 (107)                                                    | 5285 (56)         |
| Obese /unfit              | 1.92 (1.42, 2.59)                                        | 1.64 (1.15, 2.31) | 1.94 (1.31, 2.88)                                             | 1.51 (0.98, 2.32) | 1.78 (1.17, 2.71)                                             | 1.09 (0.68, 1.77) |
| <i>n (deaths)</i>         | 2657 (128)                                               | 2507 (56)         | 2203 (71)                                                     | 2151 (36)         | 1681 (63)                                                     | 1370 (25)         |
| Obese /medium fit         | 1.50 (1.11, 2.03)                                        | 1.36 (0.99, 1.88) | 1.50 (1.02, 2.22)                                             | 1.09 (0.72, 1.65) | 1.41 (0.95, 2.10)                                             | 0.87 (0.58, 1.30) |
| <i>n (deaths)</i>         | 3704 (120)                                               | 3722 (70)         | 3190 (69)                                                     | 3193 (40)         | 3013 (79)                                                     | 2847 (42)         |
| Obese /fit                | 1.38 (0.98, 1.95)                                        | 1.20 (0.82, 1.77) | 1.19 (0.75, 1.89)                                             | 1.13 (0.70, 1.83) | 0.94 (0.60, 1.48)                                             | 0.68 (0.44, 1.05) |
| <i>n (deaths)</i>         | 2155 (64)                                                | 2068 (38)         | 1823 (32)                                                     | 1730 (24)         | 2386 (42)                                                     | 2835 (33)         |

Hazard ratios with 95% CI. Adjusted for age (time scale), Townsend index, education, partner status, ethnicity, employment status, diet pattern, alcohol intake, smoking status, TV-viewing, depression, asthma, hormone replacement therapy (women only), beta-blockers, calcium-channel blockers, statins, hypertension, diabetes (including CVD and cancer in model 1). Follow-up is commenced 2 years after baseline in models (2 and 4). CRF; cardiorespiratory fitness in watts, FFM; fat-free mass, BF%; body fat percent, BW; Body weight, CVD; cardiovascular disease,

**Table S6. Cardiorespiratory fitness-fatness combinations and All-Cause Mortality among participants with a graded exercise test**

|                              | Model 1<br>CRF/kg + BMI<br><br>All participants<br>(adjusting for prevalent<br>cancer/CVD) | Model 2<br>CRF/kg + BMI<br><br>Free from CVD/cancer at<br>baseline and removing early<br>follow-up | Model 3<br>CRF/kg + BMI<br><br>Never-smokers,<br>free from CVD/cancer,<br>removing early follow-up | Model 4<br>CRF/FFM + BF%<br><br>Free from CVD/cancer at<br>baseline and removing early<br>follow-up | Model 5<br>CRF/FFM + BF%<br><br>Never-smokers,<br>free from CVD/cancer,<br>removing early follow-up |
|------------------------------|--------------------------------------------------------------------------------------------|----------------------------------------------------------------------------------------------------|----------------------------------------------------------------------------------------------------|-----------------------------------------------------------------------------------------------------|-----------------------------------------------------------------------------------------------------|
| <i>N (deaths)</i>            | 72,846 (1565)                                                                              | 63,539 (924)                                                                                       | 36,829 (396)                                                                                       | 63,539 (924)                                                                                        | 36,829 (396)                                                                                        |
| Normal weight<br>/unfit      | 1.74 (1.35, 2.23)                                                                          | 1.41 (1.01, 1.96)                                                                                  | 1.39 (0.87, 2.23)                                                                                  | 1.01 (0.73, 1.39)                                                                                   | 0.97 (0.63, 1.52)                                                                                   |
| <i>n (deaths)</i>            | 3909 (104)                                                                                 | 3409 (56)                                                                                          | 2153 (28)                                                                                          | 4502 (63)                                                                                           | 2883 (33)                                                                                           |
| Normal weight<br>/medium fit | 1.47 (1.19, 1.83)                                                                          | 1.27 (0.96, 1.67)                                                                                  | 0.97 (0.63, 1.48)                                                                                  | 0.86 (0.64, 1.14)                                                                                   | 0.67 (0.44, 1.01)                                                                                   |
| <i>n (deaths)</i>            | 9043 (184)                                                                                 | 7873 (102)                                                                                         | 4983 (39)                                                                                          | 8871 (92)                                                                                           | 5525 (38)                                                                                           |
| Normal weight<br>/fit        | <i>ref</i>                                                                                 | <i>ref</i>                                                                                         | <i>ref</i>                                                                                         | <i>ref</i>                                                                                          | <i>ref</i>                                                                                          |
| <i>n (deaths)</i>            | 12,466 (149)                                                                               | 11,086 (99)                                                                                        | 6744 (48)                                                                                          | 9224 (99)                                                                                           | 5537 (51)                                                                                           |
| Overweight<br>/unfit         | 1.64 (1.31, 2.06)                                                                          | 1.52 (1.14, 2.02)                                                                                  | 1.47 (0.96, 2.24)                                                                                  | 1.18 (0.89, 1.57)                                                                                   | 0.98 (0.64, 1.50)                                                                                   |
| <i>n (deaths)</i>            | 5392 (167)                                                                                 | 4635 (100)                                                                                         | 2736 (44)                                                                                          | 4752 (103)                                                                                          | 2781 (43)                                                                                           |
| Overweight<br>/medium fit    | 1.25 (1.02, 1.53)                                                                          | 1.08 (0.84, 1.40)                                                                                  | 1.17 (0.81, 1.70)                                                                                  | 0.87 (0.67, 1.12)                                                                                   | 0.81 (0.56, 1.17)                                                                                   |
| <i>n (deaths)</i>            | 13,345 (279)                                                                               | 11,659 (159)                                                                                       | 6657 (75)                                                                                          | 11,237 (157)                                                                                        | 6512 (72)                                                                                           |
| Overweight<br>/fit           | 1.29 (1.05, 1.58)                                                                          | 1.22 (0.95, 1.57)                                                                                  | 1.21 (0.84, 1.76)                                                                                  | 0.88 (0.69, 1.14)                                                                                   | 0.76 (0.52, 1.11)                                                                                   |
| <i>n (deaths)</i>            | 13,064 (264)                                                                               | 11,486 (167)                                                                                       | 6268 (68)                                                                                          | 11,766 (160)                                                                                        | 6488 (62)                                                                                           |
| Obese<br>/unfit              | 1.83 (1.44, 2.32)                                                                          | 1.73 (1.28, 2.34)                                                                                  | 1.44 (0.90, 2.30)                                                                                  | 1.29 (0.93, 1.78)                                                                                   | 0.86 (0.51, 1.47)                                                                                   |
| <i>n (deaths)</i>            | 4370 (151)                                                                                 | 3730 (92)                                                                                          | 2158 (33)                                                                                          | 2492 (69)                                                                                           | 1401 (21)                                                                                           |
| Obese<br>/medium fit         | 1.43 (1.14, 1.79)                                                                          | 1.19 (0.89, 1.59)                                                                                  | 1.12 (0.72, 1.75)                                                                                  | 1.05 (0.79, 1.40)                                                                                   | 0.91 (0.60, 1.40)                                                                                   |
| <i>n (deaths)</i>            | 7147 (174)                                                                                 | 6184 (96)                                                                                          | 3336 (36)                                                                                          | 5594 (112)                                                                                          | 3042 (43)                                                                                           |
| Obese<br>/fit                | 1.26 (0.97, 1.65)                                                                          | 1.11 (0.79, 1.56)                                                                                  | 1.43 (0.87, 2.35)                                                                                  | 0.73 (0.53, 1.01)                                                                                   | 0.87 (0.55, 1.36)                                                                                   |
| <i>n (deaths)</i>            | 4110 (93)                                                                                  | 3477 (53)                                                                                          | 1794 (25)                                                                                          | 5102 (69)                                                                                           | 2660 (33)                                                                                           |

Hazard ratios with 95% CI. Adjusted for age (time scale), sex, Townsend index, education, partner status, ethnicity, employment status, diet pattern, alcohol intake, smoking status, TV-viewing, depression, asthma, hormone replacement therapy (women only), beta-blockers, calcium-channel blockers, statins, hypertension and diabetes (including CVD and cancer in model 1). Follow-up is commenced 2 years after baseline in models (2-5). CRF; cardiorespiratory fitness in watts, BMI; body mass index, FFM; fat-free mass, BF%; body fat percent, CVD; cardiovascular disease

**Table S7. Cardiorespiratory fitness-fatness combinations and all-cause Mortality, age-stratified**

|                              | Model 1<br>CRF/kg + BMI                                  |                   | Model 2<br>CRF/kg + BMI                                          |                   | Model 4<br>CRF/FFM + BF%                                         |                   |
|------------------------------|----------------------------------------------------------|-------------------|------------------------------------------------------------------|-------------------|------------------------------------------------------------------|-------------------|
|                              | All participants<br>(adjusting for prevalent cancer/CVD) |                   | Free from CVD/cancer at baseline and removing early<br>follow-up |                   | Free from CVD/cancer at baseline and removing early<br>follow-up |                   |
|                              | <60 yo                                                   | ≥60 yo            | <60 yo                                                           | ≥60 yo            | <60 yo                                                           | ≥60 yo            |
| <i>N (deaths)</i>            | 40,680 (469)                                             | 36,489 (1262)     | 37,071 (295)                                                     | 29,872 (711)      | 37,021 (295)                                                     | 29,872 (711)      |
| Normal weight<br>/unfit      | 1.47 (0.94, 2.31)                                        | 1.70 (1.28, 2.26) | 1.12 (0.62, 2.02)                                                | 1.48 (1.02, 2.15) | 0.95 (0.58, 1.56)                                                | 1.03 (0.70, 1.51) |
| Normal weight<br>/medium fit | 1.56 (1.09, 2.24)                                        | 1.40 (1.09, 1.80) | 1.37 (0.87, 2.16)                                                | 1.19 (0.86, 1.65) | 0.78 (0.50, 1.22)                                                | 0.89 (0.63, 1.26) |
| Normal weight<br>/fit        | <i>ref</i>                                               | <i>ref</i>        | <i>ref</i>                                                       | <i>ref</i>        | <i>ref</i>                                                       | <i>ref</i>        |
| Overweight<br>/unfit         | 1.80 (1.22, 2.64)                                        | 1.43 (1.11, 1.85) | 1.64 (1.03, 2.63)                                                | 1.33 (0.95, 1.87) | 1.05 (0.66, 1.65)                                                | 1.20 (0.85, 1.69) |
| Overweight<br>/medium fit    | 0.94 (0.65, 1.37)                                        | 1.30 (1.04, 1.63) | 0.74 (0.46, 1.19)                                                | 1.17 (0.87, 1.57) | 0.71 (0.47, 1.09)                                                | 0.95 (0.70, 1.30) |
| Overweight<br>/fit           | 1.16 (0.80, 1.66)                                        | 1.27 (1.00, 1.60) | 1.10 (0.71, 1.71)                                                | 1.19 (0.89, 1.60) | 0.68 (0.44, 1.05)                                                | 0.96 (0.70, 1.30) |
| Obese<br>/unfit              | 1.72 (1.15, 2.56)                                        | 1.73 (1.33, 2.26) | 1.51 (0.92, 2.48)                                                | 1.68 (1.19, 2.37) | 1.07 (0.62, 1.83)                                                | 1.46 (1.01, 2.11) |
| Obese<br>/medium fit         | 1.38 (0.93, 2.04)                                        | 1.40 (1.08, 1.81) | 1.11 (0.68, 1.81)                                                | 1.31 (0.94, 1.83) | 0.81 (0.50, 1.33)                                                | 1.18 (0.85, 1.65) |
| Obese<br>/fit                | 1.01 (0.61, 1.68)                                        | 1.37 (1.02, 1.84) | 0.94 (0.50, 1.77)                                                | 1.18 (0.80, 1.74) | 0.49 (0.27, 0.91)                                                | 0.89 (0.62, 1.28) |

Hazard ratios with 95% CI. Adjusted for age (time scale), Townsend index, education, partner status, ethnicity, employment status, diet pattern, alcohol intake, smoking status, TV-viewing, depression, asthma, hormone replacement therapy (women only), beta-blockers, calcium-channel blockers, statins, hypertension, diabetes (including CVD and cancer in model 1). Follow-up is commenced 2 years after baseline in models (2 and 4). CRF; cardiorespiratory fitness in watts, BMI; body mass index, FFM; fat-free mass, BF%; body fat percent, CVD; cardiovascular disease

**Table S8. Cardiorespiratory fitness-fatness combinations and All-Cause Mortality using waist circumference as adiposity marker**

|                              | Model 1<br>CRF/kg + waist circumference                  |                   | Model 2<br>CRF/kg + waist circumference                          |                   | Model 4<br>CRF/FFM + waist circumference                         |                   |
|------------------------------|----------------------------------------------------------|-------------------|------------------------------------------------------------------|-------------------|------------------------------------------------------------------|-------------------|
|                              | All participants<br>(adjusting for prevalent cancer/CVD) |                   | Free from CVD/cancer at baseline and removing early<br>follow-up |                   | Free from CVD/cancer at baseline and removing early<br>follow-up |                   |
|                              | Men                                                      | Women             | Men                                                              | Women             | Men                                                              | Women             |
| <i>N (deaths)</i>            | 36,427 (1065)                                            | 40,734 (665)      | 31,861 (621)                                                     | 35,078 (385)      | 31,861 (621)                                                     | 35,078 (385)      |
| Normal weight<br>/unfit      | 1.64 (1.34, 2.00)                                        | 1.21 (0.92, 1.59) | 1.61 (1.24, 2.09)                                                | 0.89 (0.62, 1.29) | 1.65 (1.28, 2.14)                                                | 0.77 (0.54, 1.10) |
| <i>n (deaths)</i>            | 4435 (138)                                               | 4682 (82)         | 3817 (107)                                                       | 4035 (41)         | 4346 (119)                                                       | 4857 (46)         |
| Normal weight<br>/medium fit | 1.22 (1.02, 1.46)                                        | 1.11 (0.89, 1.39) | 1.15 (0.91, 1.45)                                                | 0.85 (0.63, 1.14) | 1.17 (0.92, 1.49)                                                | 0.73 (0.54, 0.99) |
| <i>n (deaths)</i>            | 9887 (260)                                               | 10,303 (158)      | 8761 (151)                                                       | 8877 (79)         | 9016 (153)                                                       | 9405 (78)         |
| Normal weight<br>/fit        | <i>ref</i>                                               | <i>ref</i>        | <i>ref</i>                                                       | <i>ref</i>        | <i>ref</i>                                                       | <i>ref</i>        |
| <i>n (deaths)</i>            | 11,603 (216)                                             | 11,892 (152)      | 10,391 (138)                                                     | 10,428 (101)      | 9607 (124)                                                       | 9078 (97)         |
| Obese<br>/unfit              | 1.59 (1.28, 1.99)                                        | 1.48 (1.11, 1.97) | 1.58 (1.18, 2.10)                                                | 1.37 (0.96, 1.97) | 1.64 (1.21, 2.24)                                                | 1.29 (0.87, 1.91) |
| <i>n (deaths)</i>            | 3047 (143)                                               | 3496 (83)         | 2553 (83)                                                        | 2980 (51)         | 2024 (69)                                                        | 2158 (40)         |
| Obese<br>/medium fit         | 1.36 (1.10, 1.69)                                        | 1.15 (0.90, 1.49) | 1.24 (0.95, 1.63)                                                | 1.03 (0.75, 1.43) | 1.36 (1.03, 1.80)                                                | 0.98 (0.70, 1.36) |
| <i>n (deaths)</i>            | 4648 (164)                                               | 6063 (113)        | 3987 (92)                                                        | 5160 (67)         | 3732 (93)                                                        | 4631 (63)         |
| Obese<br>/fit                | 1.34 (1.05, 1.70)                                        | 1.04 (0.78, 1.37) | 1.11 (0.80, 1.54)                                                | 0.98 (0.69, 1.40) | 1.10 (0.81, 1.50)                                                | 0.89 (0.64, 1.24) |
| <i>n (deaths)</i>            | 2810 (99)                                                | 4304 (77)         | 2354 (50)                                                        | 3603 (46)         | 3138 (63)                                                        | 4954 (61)         |

Hazard ratios with 95% CI. Obesity was defined as waist circumference  $\geq 88$  cm for women and  $\geq 102$  cm for men. Adjusted for age (time scale), Townsend index, education, partner status, ethnicity, employment status, diet pattern, alcohol intake, smoking status, TV-viewing, depression, asthma, hormone replacement therapy (women only), beta-blockers, calcium-channel blockers, statins, hypertension, diabetes (including CVD and cancer in model 1). Follow-up is commenced 2 years after baseline in models (2 and 4). CRF; cardiorespiratory fitness in watts, FFM; fat-free mass, CVD; cardiovascular disease

**Table S9. Cardiorespiratory fitness-fatness combinations and All-Cause Mortality omitting control for potential mediating variables**

|                              | Model 1<br>CRF/kg + BMI<br><br>All participants<br>(adjusting for prevalent<br>cancer/CVD) | Model 2<br>CRF/kg + BMI<br><br>Free from CVD/cancer at<br>baseline and removing early<br>follow-up | Model 3<br>CRF/kg + BMI<br><br>Never-smokers,<br>free from CVD/cancer at<br>baseline and removing early<br>follow-up | Model 4<br>CRF/FFM + BF%<br><br>Free from CVD/cancer at<br>baseline and removing early<br>follow-up | Model 5<br>CRF/FFM + BF%<br><br>Never-smokers,<br>free from CVD/cancer at<br>baseline and removing early<br>follow-up |
|------------------------------|--------------------------------------------------------------------------------------------|----------------------------------------------------------------------------------------------------|----------------------------------------------------------------------------------------------------------------------|-----------------------------------------------------------------------------------------------------|-----------------------------------------------------------------------------------------------------------------------|
| <i>N (deaths)</i>            | 71,169 (1731)                                                                              | 69,943 (1006)                                                                                      | 38,884 (423)                                                                                                         | 69,943 (1006)                                                                                       | 38,884 (423)                                                                                                          |
| Normal weight<br>/unfit      | 1.66 (1.31, 2.10)                                                                          | 1.41 (1.04, 1.93)                                                                                  | 1.49 (0.95, 2.33)                                                                                                    | 1.04 (0.77, 1.41)                                                                                   | 0.98 (0.64, 1.52)                                                                                                     |
| Normal weight<br>/medium fit | 1.45 (1.18, 1.78)                                                                          | 1.27 (0.97, 1.65)                                                                                  | 1.06 (0.71, 1.59)                                                                                                    | 0.86 (0.65, 1.12)                                                                                   | 0.69 (0.46, 1.04)                                                                                                     |
| Normal weight<br>/fit        | <i>ref</i>                                                                                 | <i>ref</i>                                                                                         | <i>ref</i>                                                                                                           | <i>ref</i>                                                                                          | <i>ref</i>                                                                                                            |
| Overweight<br>/unfit         | 1.59 (1.29, 1.96)                                                                          | 1.56 (1.19, 2.04)                                                                                  | 1.57 (1.05, 2.36)                                                                                                    | 1.24 (0.94, 1.62)                                                                                   | 1.13 (0.76, 1.68)                                                                                                     |
| Overweight<br>/medium fit    | 1.22 (1.01, 1.48)                                                                          | 1.09 (0.85, 1.39)                                                                                  | 1.22 (0.85, 1.75)                                                                                                    | 0.90 (0.70, 1.15)                                                                                   | 0.89 (0.62, 1.28)                                                                                                     |
| Overweight<br>/fit           | 1.26 (1.04, 1.53)                                                                          | 1.21 (0.95, 1.54)                                                                                  | 1.28 (0.89, 1.84)                                                                                                    | 0.89 (0.70, 1.15)                                                                                   | 0.80 (0.55, 1.16)                                                                                                     |
| Obese<br>/unfit              | 1.90 (1.53, 2.35)                                                                          | 1.92 (1.46, 2.53)                                                                                  | 1.70 (1.10, 2.62)                                                                                                    | 1.54 (1.15, 2.06)                                                                                   | 1.14 (0.71, 1.82)                                                                                                     |
| Obese<br>/medium fit         | 1.48 (1.20, 1.83)                                                                          | 1.40 (1.07, 1.83)                                                                                  | 1.37 (0.90, 2.09)                                                                                                    | 1.17 (0.90, 1.53)                                                                                   | 1.04 (0.69, 1.56)                                                                                                     |
| Obese<br>/fit                | 1.38 (1.07, 1.76)                                                                          | 1.25 (0.90, 1.73)                                                                                  | 1.64 (1.02, 2.65)                                                                                                    | 0.85 (0.63, 1.15)                                                                                   | 1.05 (0.68, 1.61)                                                                                                     |

Hazard ratios with 95% CI. Adjusted for age (time scale), sex, Townsend index, education, partner status, ethnicity, employment status, diet pattern, alcohol intake, smoking status, TV-viewing, depression, asthma and hormone replacement therapy (women only and including CVD and cancer in model 1. Follow-up is commenced 2 years after baseline in models (2 and 4). CRF; cardiorespiratory fitness in watts, BMI; body mass index, FFM; fat-free mass, BF%; body fat percentage, CVD; cardiovascular disease.

**Table S10. Cardiorespiratory fitness-fatness combinations and CVD- and cancer-specific mortality**

|                              | Analysis 1<br>CRF/kg + BMI                               |                   | Analysis 4<br>CRF/FFM + BF%                                      |                   |
|------------------------------|----------------------------------------------------------|-------------------|------------------------------------------------------------------|-------------------|
|                              | All participants<br>(adjusting for prevalent cancer/CVD) |                   | Free from CVD/cancer at baseline and removing early<br>follow-up |                   |
|                              | Cancer mortality                                         | CVD mortality     | Cancer mortality                                                 | CVD mortality     |
| <i>N (deaths)</i>            | 71,169 (1121)                                            | 71,169 (327)      | 66943 (622)                                                      | 66,953 (192)      |
| Normal weight<br>/unfit      | 1.47 (1.10, 1.96)                                        | 2.60 (1.31, 5.17) | 0.81 (0.55, 1.20)                                                | 1.28 (0.59, 2.78) |
| <i>n (deaths)</i>            | 4373 (74)                                                | 4373 (19)         | 4975 (39)                                                        | 4975 (13)         |
| Normal weight<br>/medium fit | 1.33 (1.04, 1.69)                                        | 2.39 (1.28, 4.46) | 0.77 (0.55, 1.08)                                                | 0.89 (0.42, 1.87) |
| <i>n (deaths)</i>            | 9585 (138)                                               | 9585 (31)         | 9267 (63)                                                        | 9267 (14)         |
| Normal weight<br>/fit        | <i>ref</i>                                               | <i>ref</i>        | <i>ref</i>                                                       | <i>ref</i>        |
| <i>n (deaths)</i>            | 13,003 (124)                                             | 13,003 (15)       | 9551 (75)                                                        | 9551 (14)         |
| Overweight<br>/unfit         | 1.38 (1.06, 1.80)                                        | 2.82 (1.54, 5.16) | 0.99 (0.70, 1.40)                                                | 1.42 (0.71, 2.86) |
| <i>n (deaths)</i>            | 6124 (114)                                               | 6124 (40)         | 5359 (64)                                                        | 5359 (22)         |
| Overweight<br>/medium fit    | 1.22 (0.97, 1.52)                                        | 1.80 (1.00, 3.24) | 0.86 (0.64, 1.16)                                                | 1.11 (0.58, 2.13) |
| <i>n (deaths)</i>            | 13,887 (210)                                             | 13,887 (47)       | 11,654 (110)                                                     | 11,654 (31)       |
| Overweight<br>/fit           | 1.19 (0.94, 1.50)                                        | 2.24 (1.26, 3.98) | 0.79 (0.58, 1.07)                                                | 1.39 (0.75, 2.60) |
| <i>n (deaths)</i>            | 13,384 (186)                                             | 13,384 (53)       | 12,005 (100)                                                     | 12,005 (38)       |
| Obese<br>/unfit              | 1.46 (1.11, 1.93)                                        | 3.71 (2.03, 6.76) | 1.03 (0.69, 1.53)                                                | 2.28 (1.13, 4.58) |
| <i>n (deaths)</i>            | 5164 (98)                                                | 5165 (48)         | 3051 (42)                                                        | 3051 (25)         |
| Obese<br>/medium fit         | 1.33 (1.03, 1.72)                                        | 2.75 (1.51, 5.00) | 1.11 (0.80, 1.53)                                                | 1.22 (0.60, 2.49) |
| <i>n (deaths)</i>            | 7426 (120)                                               | 7426 (43)         | 5860 (81)                                                        | 5860 (21)         |
| Obese<br>/fit                | 1.06 (0.77, 1.45)                                        | 3.27 (1.75, 6.10) | 0.76 (0.52, 1.09)                                                | 0.95 (0.44, 2.06) |
| <i>n (deaths)</i>            | 4223 (57)                                                | 4223 (31)         | 5221 (48)                                                        | 5221 (14)         |

Hazard ratios with 95% CI. Adjusted for age (time scale), Townsend index, education, partner status, ethnicity, employment status, diet pattern, alcohol intake, smoking status, TV-viewing, depression, asthma, hormone replacement therapy (women only), beta-blockers, calcium-channel blockers, statins, hypertension, diabetes (including CVD and cancer in model 1). Follow-up is commenced 2 years after baseline in model 5. CVD mortality are ICD-10 codes I05-I89.9. Cancer mortality are ICD-10 codes C-D48. CRF; cardiorespiratory fitness in watts, BMI; body mass index, FFM; fat-free mass, BF%; body fat percentage, CVD; cardiovascular disease.



## **Figure S1. Participant Flowchart.**

**Participants attending baseline assessment, N=502 536**

**Participants offered cardiorespiratory fitness assessment,**

n = 78 959 (baseline)

n = 20 208 (repeat)

N = 96 208

**Participants with submaximal test (graded or constant resistance),**

n = 68 665 (baseline)

n = 18 216 (repeat)

N = 84 406

**Participants with CRF test passing quality control procedures,**

n = 65 913 (baseline)

n = 17 768 (repeat)

N = 81 377

**Participants without a history of respiratory disease (including COPD), chronic immunological or systemic disease, liver failure/cirrhosis, schizophrenia, mania/bipolar disorder/manic depression, deliberate self-harm/suicide attempt, post-traumatic stress disorder, substance abuse/dependency, eating disorders, chronic/degenerative neurological problems, chronic widespread pain, BMI<18.5 and measured BMI and %body fat,**

N = 62 498 (baseline)

N = 16 845 (repeat)

N = 77 169

**Keeping only baseline file in individuals with data both time-points,**

N = 62 498 (baseline)

N = 14 671 (repeat)

N = 77 169

**Imputed data on co-variates**

N = 58 600 complete, 3 898 with variables imputed (baseline)

N = 14 267 complete, 404 with variables imputed (repeat)

N = 72 876 complete, 4 302 with variables imputed

**Participants with no history of cancer or CVD**

N = 54 637 (baseline)

N = 12 502 (repeat)

N = 67 139

**Participants surviving >2 years after CRF assessment**

N = 54 488 (baseline)

N = 12 455 (repeat)

N = 66 943

n = observations, N = unique participants, 'baseline' refers to the study baseline assessment, 'repeat' refers to individuals invited to repeat baseline measures (now including cardiorespiratory fitness assessment)
